# Supplementary material
Source: Springer Nature journal article supplement (https://www.springermedizin.de/resource/supplementary/12916_2010_298_MOESM3_ESM.pdf/9599588)

### A) SBP hypertensive subgroup ( $\geq 140$ mm Hg)

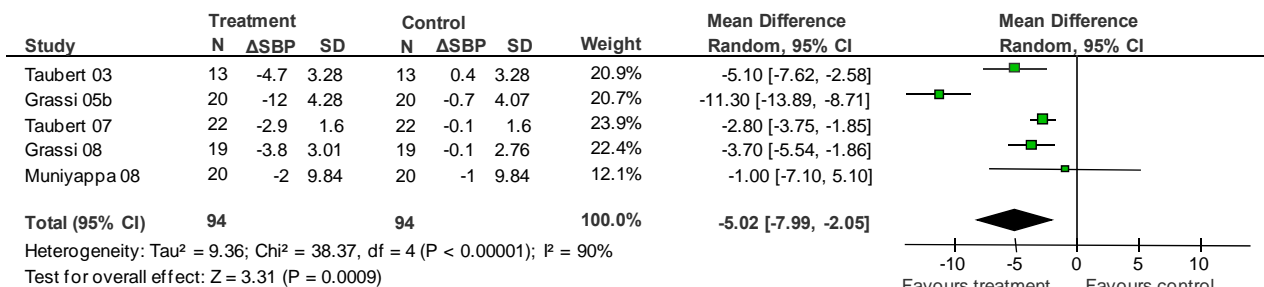

### B) SBP normotensive subgroup ( $< 140$ mm Hg)

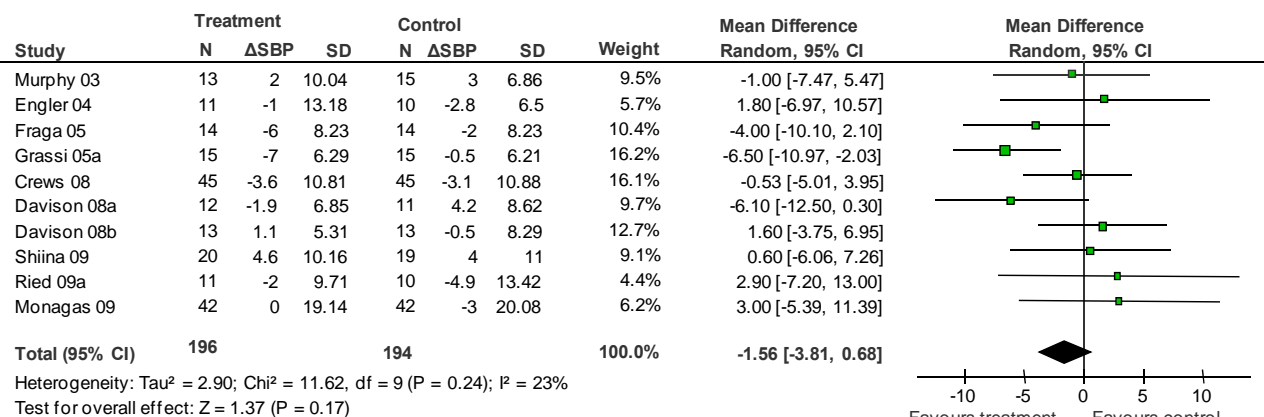

### C) DBP (pre-) hypertensive subgroup ( $\geq 80$ mm Hg)

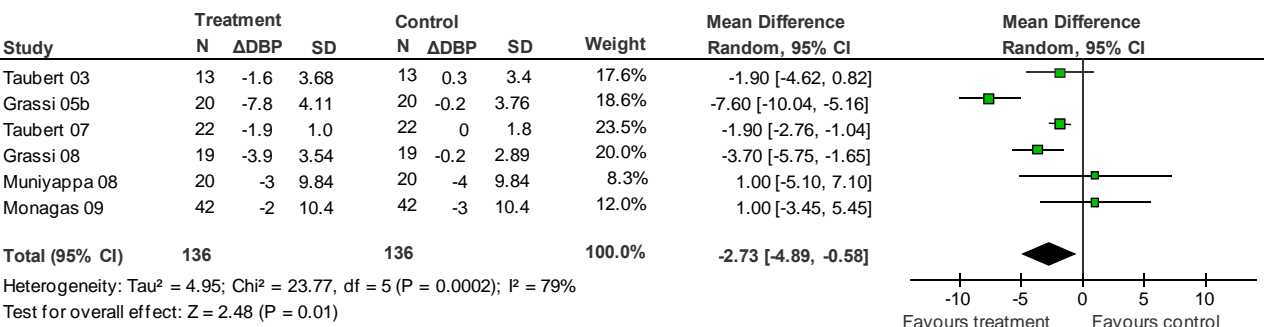

### D) DBP normotensive subgroup ( $< 80$ mm Hg)

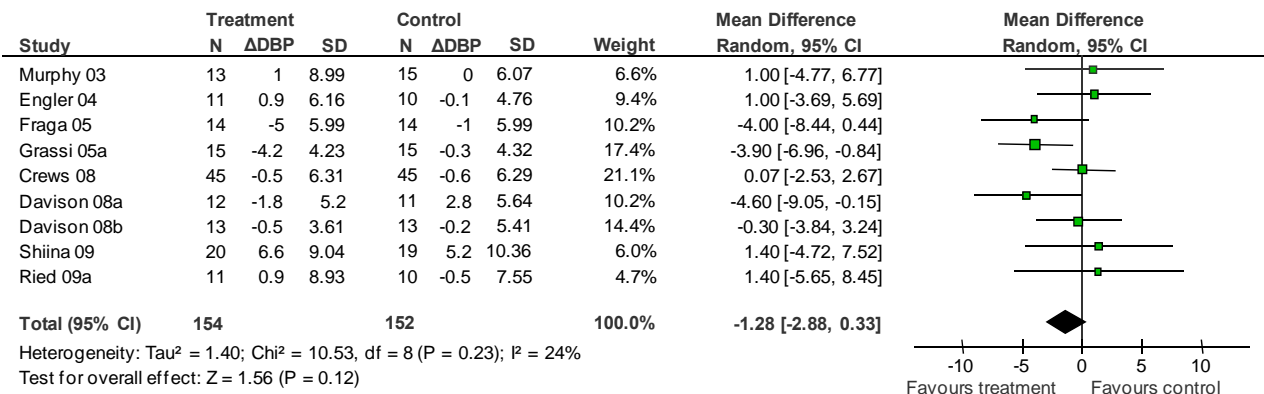

Supplement: MOESM3 [file 9599588]
